# Supplementary material
Source: PubMed Central journal article supplement (PMC2494526)
Supplement: NIHMS56518-supplement-SI.pdf [file NIHMS56518-supplement-SI.pdf]

# Type-2 Isopentenyl Diphosphate Isomerase. Mechanistic Studies with Cyclopropyl and Epoxy Analogs

Jonathan B. Johnston, Joel R. Walker<sup>‡</sup>, Steven C. Rothman, and C. Dale Poulter<sup>\*</sup>

## Supporting Information

### CONTENTS

|                                                                                                                                           |            |
|-------------------------------------------------------------------------------------------------------------------------------------------|------------|
| <b>I. Materials</b>                                                                                                                       | <b>S2</b>  |
| <b>II. Enzyme Assays</b>                                                                                                                  | <b>S2</b>  |
| <b>III. Inactivation Kinetics</b>                                                                                                         | <b>S2</b>  |
| <b>IV. Large Scale Inactivation Experiments</b>                                                                                           | <b>S2</b>  |
| <b>V. NMR assay</b>                                                                                                                       | <b>S4</b>  |
| <b>VI. Physical Data</b>                                                                                                                  | <b>S4</b>  |
| <b>VII. References</b>                                                                                                                    | <b>S5</b>  |
| <b>Figure S1.</b> NMR spectra for conversion of cIPP to cDMAPP                                                                            | <b>S6</b>  |
| <b>Figure S2.</b> Time course of cIPP isomerization into cDMAPP                                                                           | <b>S7</b>  |
| <b>Figure S3.</b> LC-MS analysis of the guanidinium-released cofactor for oIPP inactivated enzyme.                                        | <b>S8</b>  |
| <b>Figure S4.</b> UV-visible spectra of enzyme-flavin complexes following 2 h incubation and aerobic washes                               | <b>S9</b>  |
| <b>Figure S5.</b> UV-visible spectra of guanidinium-released flavin for oIPP inactivated enzyme                                           | <b>S10</b> |
| <b>Figure S6.</b> UV-visible spectra of guanidinium-released flavins following ultrafiltration.                                           | <b>S11</b> |
| <b>Figure S7.</b> Negative ion electrospray mass spectra of large scale H <sub>2</sub> O and D <sub>2</sub> O oIPP inactivation reactions | <b>S12</b> |

- I. Materials.** The synthesis of oIPP and cIPP will be reported elsewhere. IPP was produced from isopentenol using published procedures.<sup>1</sup> *Thermus thermophilus* IDI-2 was expressed in *E. coli* and purified as described.<sup>2</sup>
- II. Enzymatic assays** were performed using the acid lability procedure of Satterwhite,<sup>3</sup> with modifications as described previously.<sup>4</sup>
- III. Inactivation kinetics.** Time-dependent inhibition of IDI-2 by cIPP and oIPP was measured as follows. Assay solutions, with a final volume of 50  $\mu$ L and final concentrations of 40 nM IDI-2, 40  $\mu$ M FMN, 2 mM NADPH, 2 mM  $MgCl_2$ , 200 mM Tris (pH 7.0) after addition of the analogs, were equilibrated for 10 min at 37 °C. The analogs were added and the samples were incubated for varying periods of time. A 5  $\mu$ L portion of the assay solutions were then diluted ten-fold into assay buffer containing 50  $\mu$ M IPP (10  $\mu$ Ci/ $\mu$ mol) and assayed by the acid lability assay according to the protocol described above. Percent residual activity was determined by comparing enzyme pre-incubated with and without analog. Plots of natural log (ln) percent residual activity versus time were used to determine  $K_I$  and  $k_{inact}$  values as described by Muehlbacher and Poulter.<sup>5</sup>
- IV. Large Scale Inactivation Experiments.** Flavin-bound IDI-2 (50  $\mu$ M) and oIPP (100  $\mu$ M) were incubated at 37 °C for 2 h in 200 mM Tris buffer, pH 7.8, containing 2 mM  $MgCl_2$ , and 4 mM NADPH. The sample was washed five times under aerobic conditions with 10 mM  $NH_4HCO_3$ , pH 7.8, at 4 °C using a Microcon™ centrifugal filter (molecular weight cut off of 30 KDa).

Parallel large scale inactivation experiments were also carried out in D<sub>2</sub>O and H<sub>2</sub>O buffers. IDI-2 was washed extensively against 200 mM Tris D<sub>2</sub>O buffer, pD 7.8, containing 2 mM MgCl<sub>2</sub> by membrane filtration. The final mixtures contained 50 μM IDI-2 (FMN-bound) and 100 μM oIPP in 200 mM Tris buffer, pH 7.8 (H<sub>2</sub>O) or pD 7.8 (99% D<sub>2</sub>O), containing 2 mM MgCl<sub>2</sub> and 5 mM NADPH. The mixtures were preincubated without inhibitor for 5 min to reduce bound FMN before addition of oIPP or IPP and then were incubated for 2 h at 37 °C. Following the incubations, the samples were washed under aerobic conditions in H<sub>2</sub>O and analyzed in protic solvents.

UV-visible spectra were recorded on an Agilent 8453 diode array spectrophotometer. For RP-HPLC studies the samples were denatured in 10 mM Tris pH 7.4 containing, 8 M guanidine chloride; protein was removed by membrane filtration; and the filtrate was chromatographed on a Phenomenex Prodigy™ ODS column, with a 5 mM ammonium acetate (pH 6.0): methanol (90:10) mobile phase. LC-MS analyses were performed with a Waters Alliance 2695 HPLC connected to a Micromass Quattro II triple quadrupole mass spectrometer, and analyzed by negative ion ESI-MS. Samples for direct infusion studies were diluted into 50:50:0.05 (H<sub>2</sub>O:acetonitrile:formic acid) and analyzed on the Micromass Quattro II triple quadrupole mass spectrometer by negative ion ESI-MS for the flavin adducts and by positive ion ESI-MS for the protein adducts.

V. **NMR assay.** The NMR assay conditions were as follows: 12  $\mu$ M IDI-2, 2.5 mM cIPP, 20  $\mu$ M FMN, 2 mM NADPH, 10 mM  $\text{MgCl}_2$ , 0.1 mg/ml BSA, 5 mM DSS, 50 mM sodium phosphate (pD 7.2, 99%  $\text{D}_2\text{O}$ ). Reactions were prepared in  $\text{H}_2\text{O}$  and exchanged with  $\text{D}_2\text{O}$ . Stock solutions of FMN and NADPH were prepared directly in  $\text{D}_2\text{O}$ . Enzyme was buffer exchanged with 50 mM phosphate buffer (pD 7.2, 99%  $\text{D}_2\text{O}$ ) using five cycles of ultrafiltration. The concentration and activity of buffer-exchanged enzyme was measured using the BCA and acid-lability assays, respectively. Data for each time point was the average of 16 scans (3.13 min per time point). The reaction was monitored for 16 h at 37  $^\circ\text{C}$ . Integrals are reported in ppm relative to an internal DSS standard.

## VI. Physical data

### **3-Cyclopropyl-but-3-en-1-yl bis-ammonium diphosphate (cIPP)**

$^1\text{H}$  NMR ( $\text{D}_2\text{O}$ )  $\delta$  0.45-0.48 (m, 2H), 0.61-0.65 (m, 2H), 1.33-1.37 (m, 1H), 2.36 (t, 2H,  $J = 6.9$  Hz), 4.06 (q, 2H,  $J = 6.9$  Hz);  $^{13}\text{C}$  NMR ( $\text{D}_2\text{O}$ )  $\delta$  6.30, 16.25, 36.53, 65.29, 108.47, 149.51;  $^{31}\text{P}$  NMR ( $\text{D}_2\text{O}$ )  $\delta$  -6.45 (d,  $J = 22.0$  Hz), -10.42 (d,  $J = 22.0$  Hz); HRMS (CI) calcd for  $\text{C}_7\text{H}_{14}\text{O}_7\text{P}_2$  (M-H) 271.0127, found 271.0137.

### **3-Oxiranyl-but-3-en-1-yl bis-ammonium diphosphate (oIPP)**

$^1\text{H}$  NMR ( $\text{DMSO-d}_6$ )  $\delta$  2.18 (br s, 2H), 2.65-2.67 (m, 1H), 2.83-2.86 (m, 1H), 3.39 (br s, 1H), 3.84 (br s, 2H), 5.06 (s, 1H), 5.18 (s, 1H);  $^{13}\text{C}$  NMR ( $\text{DMSO-d}_6$ )  $\delta$  31.2, 47.2, 53.2, 62.0, 114.1, 142.6;  $^{31}\text{P}$  NMR ( $\text{DMSO-d}_6$ )  $\delta$  -8.45 (br s), -9.90 (br s); HRMS (MALDI) calcd for  $\text{C}_6\text{H}_{12}\text{O}_8\text{P}_2$  (M-H) 272.9929, found 272.9943.

### **2-Cyclopropyl-but-3-en-2-ol (solvolized cIPP)**

$^1\text{H}$  NMR ( $\text{D}_2\text{O}$ )  $\delta$  0.23-0.42 (m, 4H), 0.96-1.05 (m, 1H), 1.20 (s, 3H), 5.06 (dd, 1H,  $J = 1.5, 10.8$  Hz), 5.17 (dd, 1H,  $J = 1.5, 17.5$  Hz), 5.81 (dd, 1H,  $J = 10.8, 17.5$  Hz).

## VII. References

- (1) (a) Davisson, V. J.; Woodside, A. B.; Poulter, C.D. *Methods Enzymol.* **1985**, 110, 130-144. (b) Davisson, V. J.; Woodside, A. B.; Neal, T. R.; Stremler, K. E.; Muehlbacher, M.; Poulter, C. D. *J. Org. Chem.* **1986**, 51, 4768-4779.
- (2) de Ruyck, J.; Rothman, S. C.; Poulter, C. D.; Wouters, J. *Biochem. Biophys. Res. Commun.* **2005**, 338, 1515-1518.
- (3) Satterwhite, D. M. *Methods Enzymol.* **1985**, 110, 92-99.
- (4) Rothman, S.C.; Helm, T.R.; Poulter, C.D. *Biochemistry*, in press.
- (5) Muehlbacher, M.; Poulter, C.D. *Biochemistry* **1988**, 27, 7315-7328.

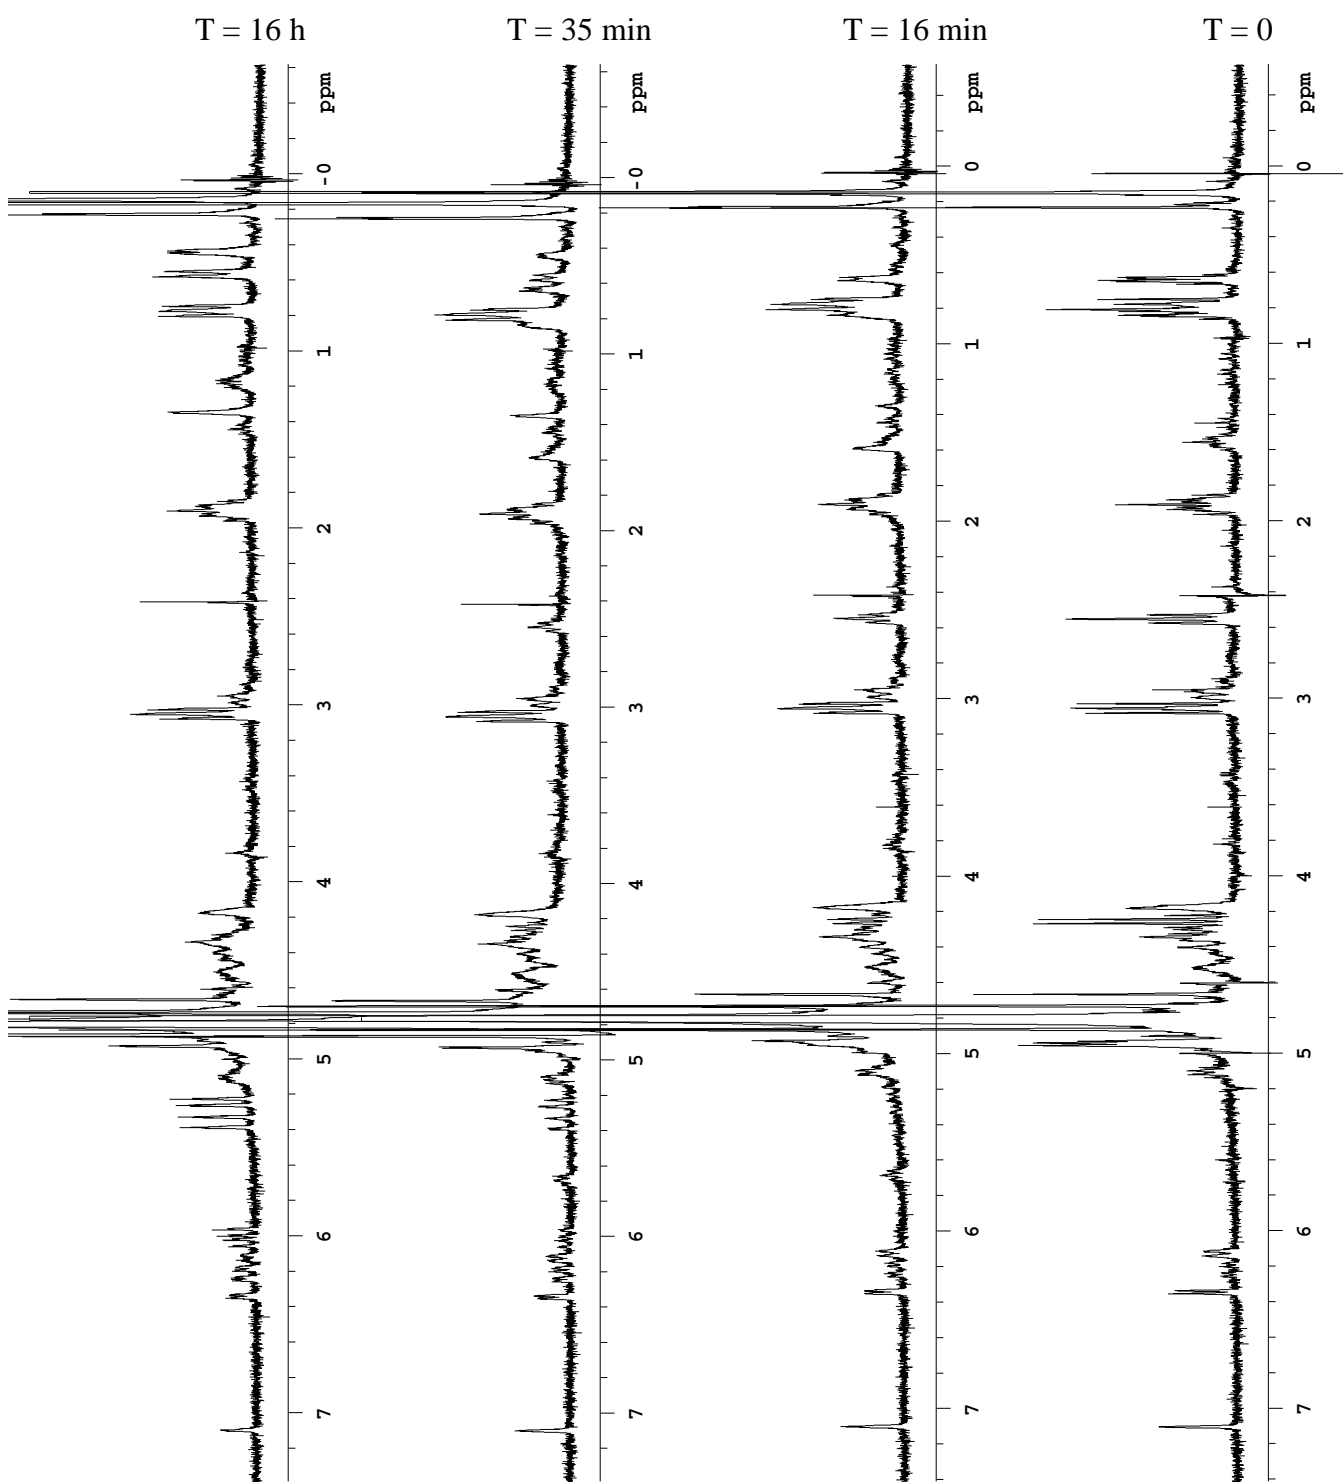

**Figure S1.** Representative NMR spectra for conversion of cIPP to cDMAPP. Reaction conditions were 50 mM NaHPO<sub>4</sub>, pD 7.2, containing 12 μM enzyme, 2.5 mM cIPP, 10 mM MgCl<sub>2</sub>, 20 μM FMN, 2 mM NADPH, 0.1 mg/ml BSA, 5 mM DSS, 900 μL final volume D<sub>2</sub>O. NMR spectra were recorded at 37 °C on a Varian Inova 500 spectrometer at 500 MHz.

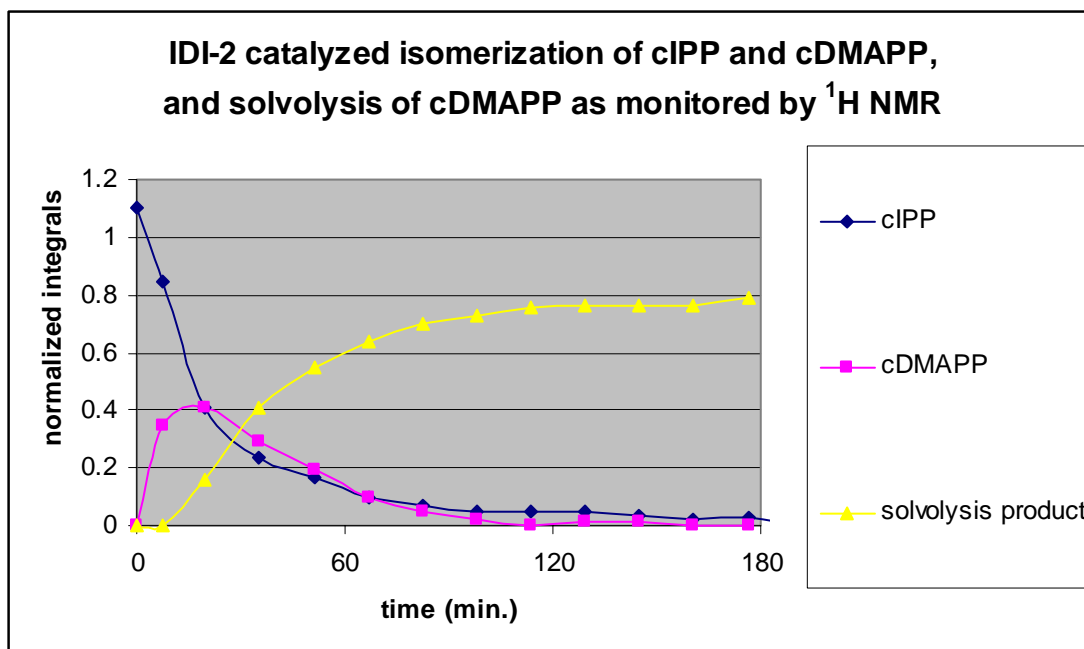

**Figure S2.** Time course for the interconversion of cIPP and cDMAPP, with concomitant solvolysis of cDMAPP, at 37 °C monitored by  $^1\text{H}$  NMR spectroscopy at 500 MHz. Ratios of substrate and products were determined from integration of the following  $^1\text{H}$  signals: cIPP (2.41 ppm), cDMAPP (1.45 ppm), solvolysis product (1.20 ppm), and DSS internal standard (0 ppm). Each spectrum was integrated, normalized relative to the internal standard and plotted as a function of time.

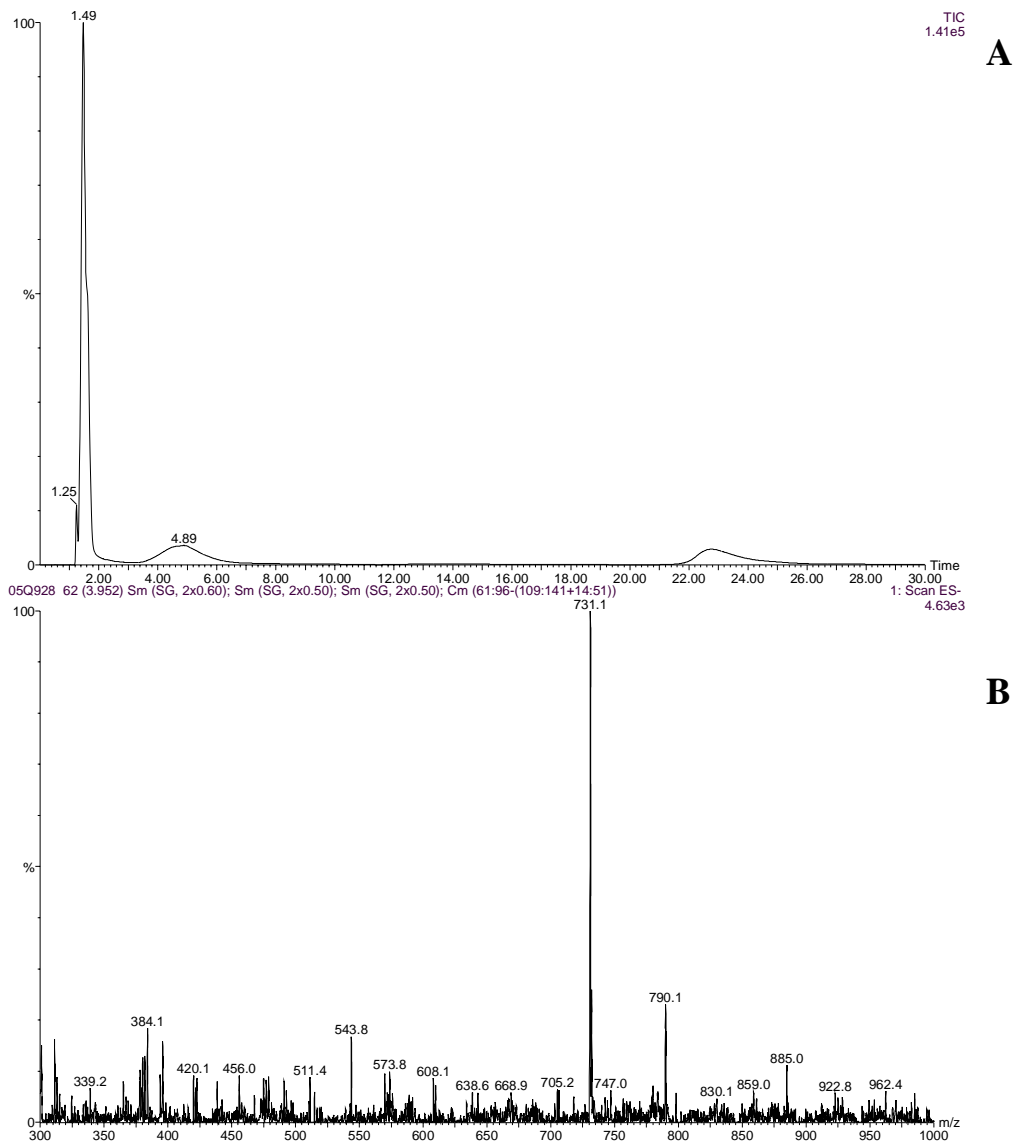

**Figure S3.** LC-MS analysis of the guanidinium-released cofactor for oIPP inactivated enzyme. A. RP-HPLC chromatogram at 270 nm. B. Negative Ion-ESI spectrum for the peak at 4.89 min.



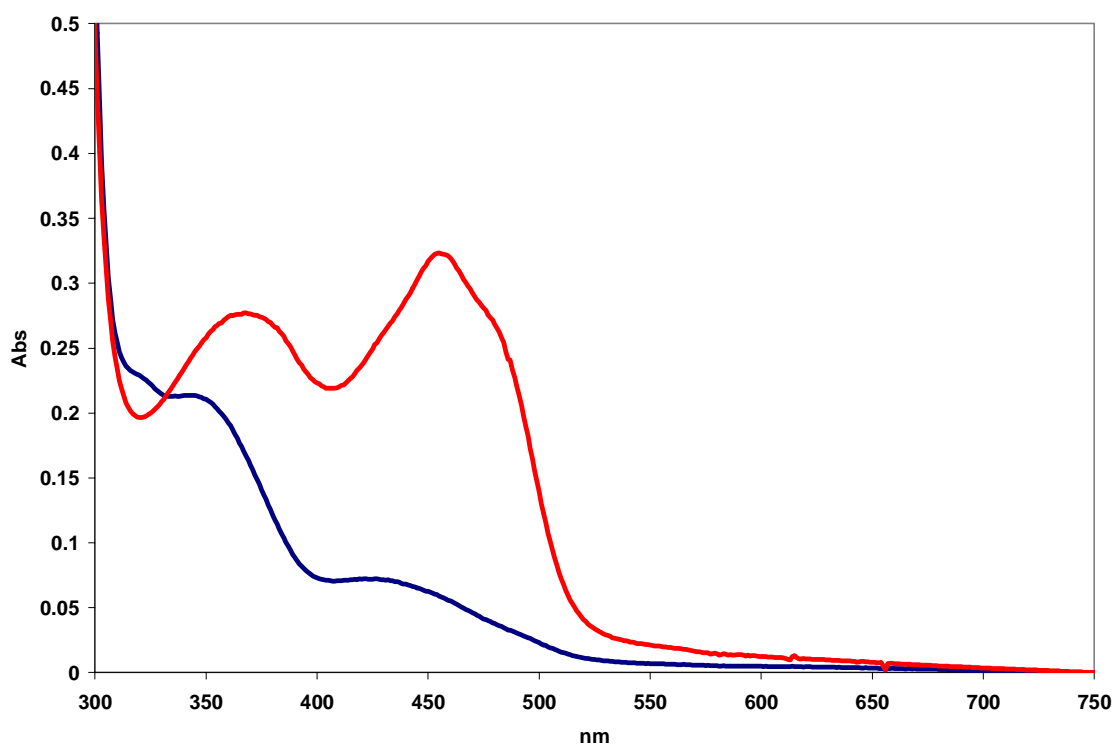

**Figure S4.** UV-visible spectra of enzyme-flavin complexes following 2 h incubation under assay conditions and subsequent aerobic washes. Shown are spectra for enzyme incubated with IPP (-) and with oIPP (-). The failure of oIPP inactivated enzyme to regenerate oxidized FMN is consistent with covalent modification of the flavin.

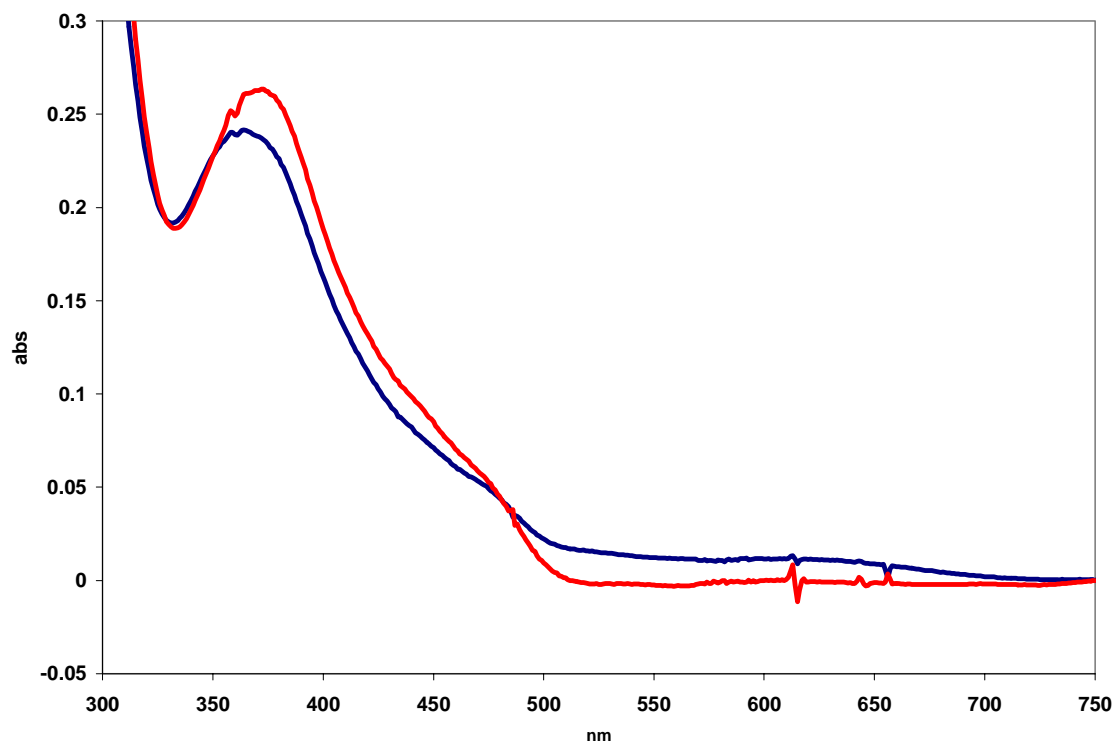

**Figure S5.** UV-visible spectrum of guanidinium-released flavin for oIPP inactivated enzyme. Shown are the spectra after initial denaturation (–) and following extended incubation (–).

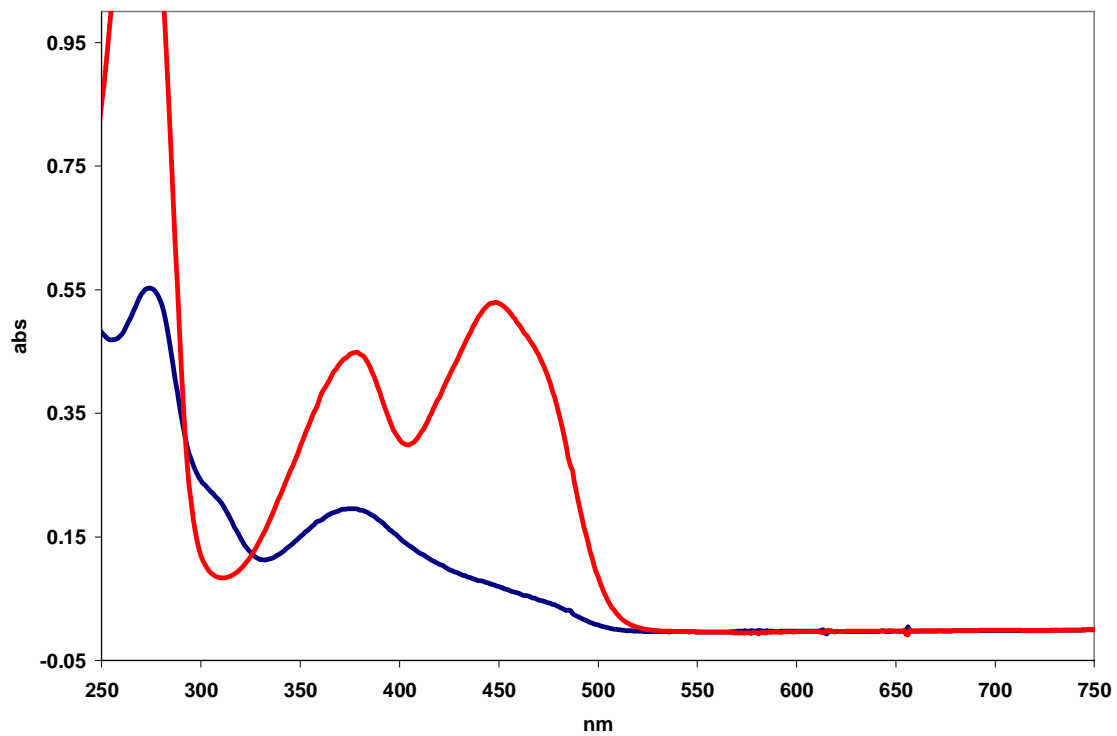

**Figure S6.** UV-visible spectra of guanidinium-released flavins following ultrafiltration. Shown are spectra for enzyme incubated with IPP (-) and with oIPP (-).

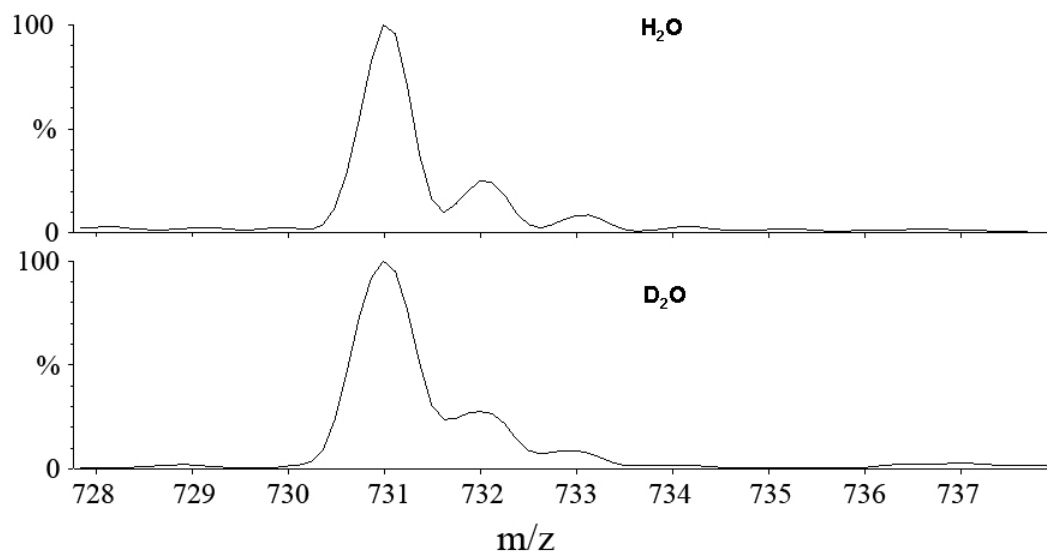

**Figure S7.** Negative ion electrospray mass spectra of large-scale inactivation reactions carried out in  $\text{H}_2\text{O}$  (top) and  $\text{D}_2\text{O}$  (bottom). Peak at 731 Da. corresponds to an [oIPP-FMNH<sub>2</sub>]<sup>M-H</sup> adduct. Theoretical mass for  $\text{C}_{23}\text{H}_{34}\text{N}_4\text{O}_{17}\text{P}_3^- = 731.1$  Da., observed mass = 731.1 Da.
